# Supplementary material
Source: PubMed Central journal article supplement (PMC3556199)

Supplemental Figure 1, Lee et al. 2012

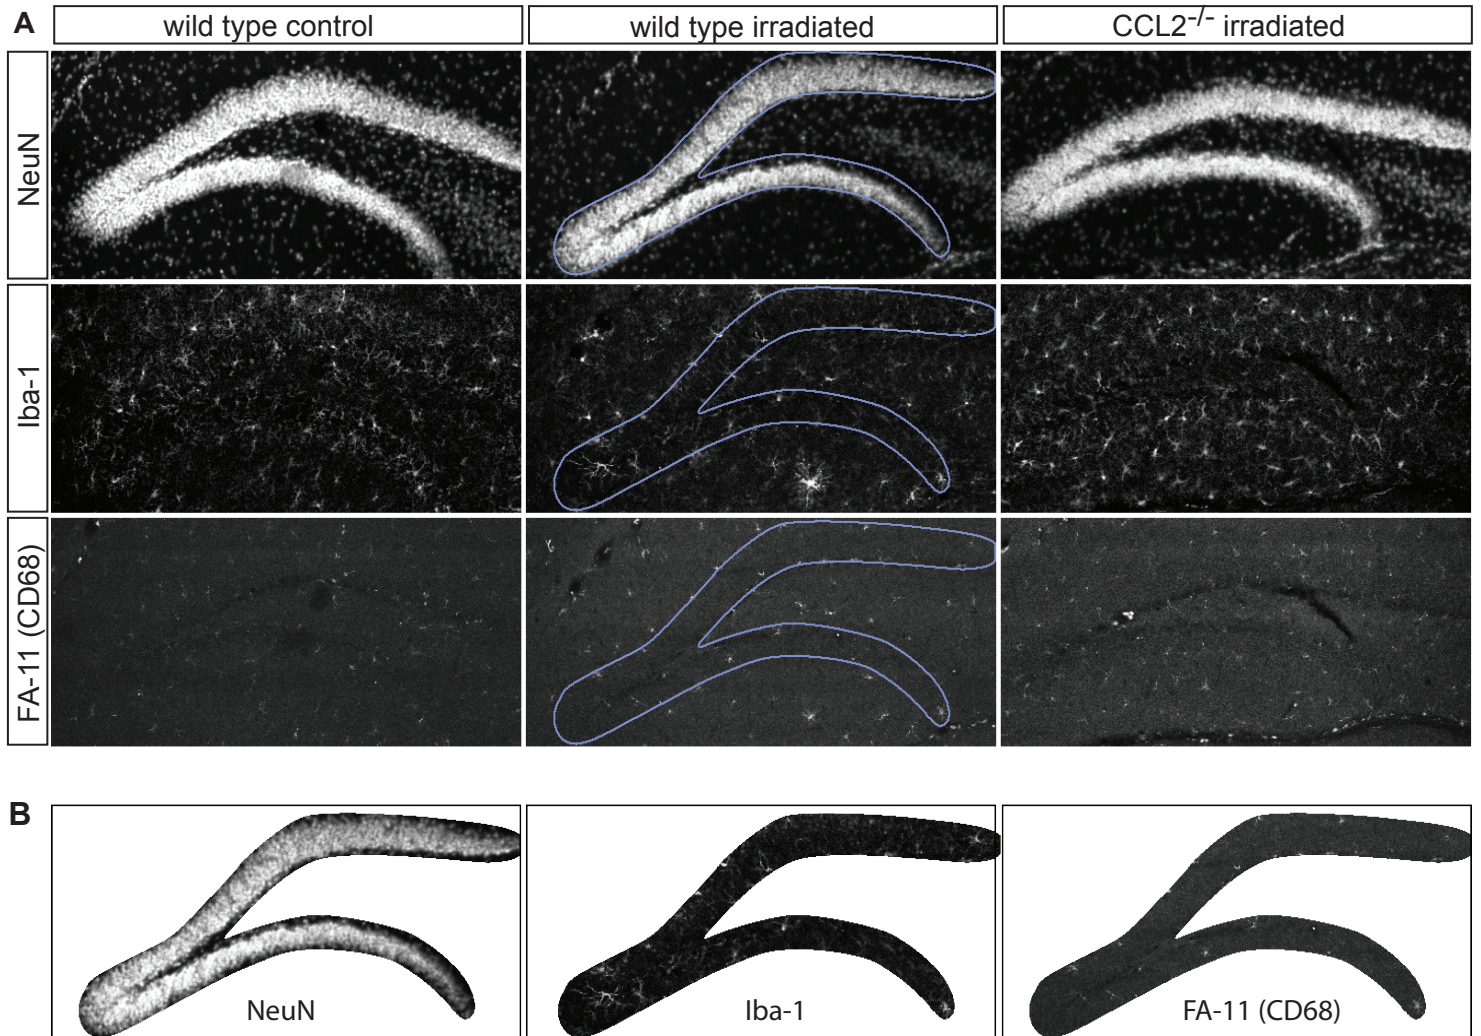

Supplement: NIHMS413185-supplement-01.pdf [file NIHMS413185-supplement-01.pdf]
